# Supplementary material for: Effects of Manipulating Fibroblast Growth Factor Expression on Sindbis Virus Replication In Vitro and in Aedes aegypti Mosquitoes
Source: MDPI journal article supplement (doi:10.3390/v12090943), 2020-08-26

## Supplemental Figures

Wu et al., Effects of manipulating fibroblast growth factor expression on Sindbis virus replication *in vitro* and in *Aedes aegypti* mosquitoes

Fig. S1. Caspase activity in Aag2 cells infected with TE or TE/vFGF. Cells were infected with TE or TE/vFGF and caspase activity was analyzed at the times shown (hours post infection or hpi) using ac-DEVD-AFC as described in the Methods. Significance was determined by t test.

Fig. S2. Caspase activity and cell viability of C6/36 cells infected with MRE, MRE/vFGF, or MRE/vFGFas. Cells were infected with the indicated viruses and caspase activity or cell viability was determined as described in the Methods at the times shown (days post-infection, or dpi). Significance was determined by t test.

Fig. S3. Caspase activity in Aag2 cells infected with TE viruses or treated with UV light as a positive control for caspase activation. The data shown for the virus-infected cells are the same data that are presented in Fig. S1.

Fig. S1

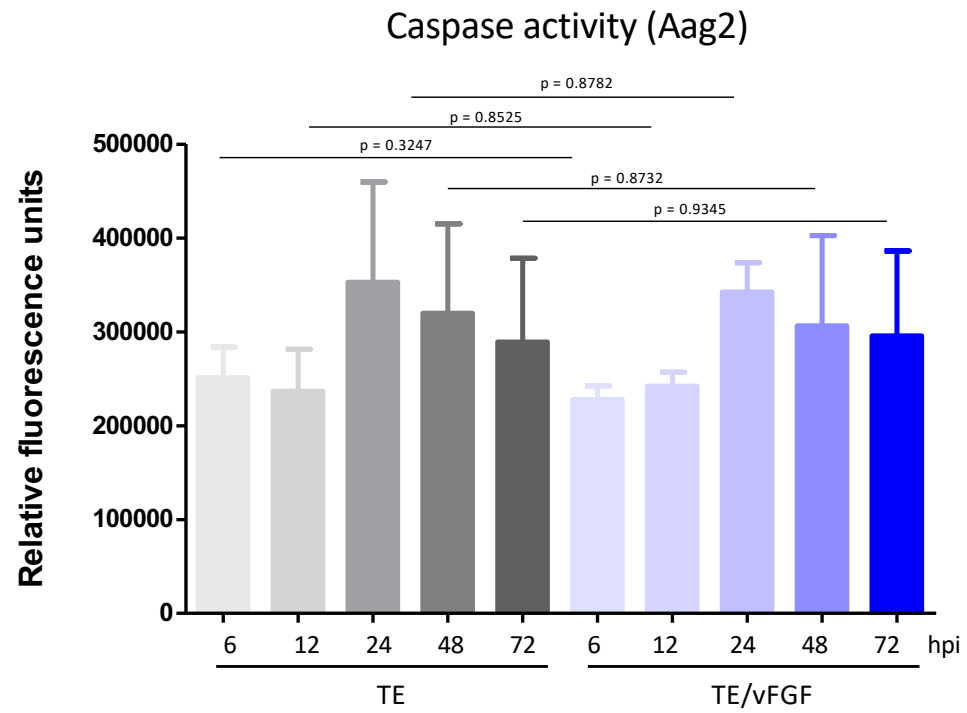

Fig. S2

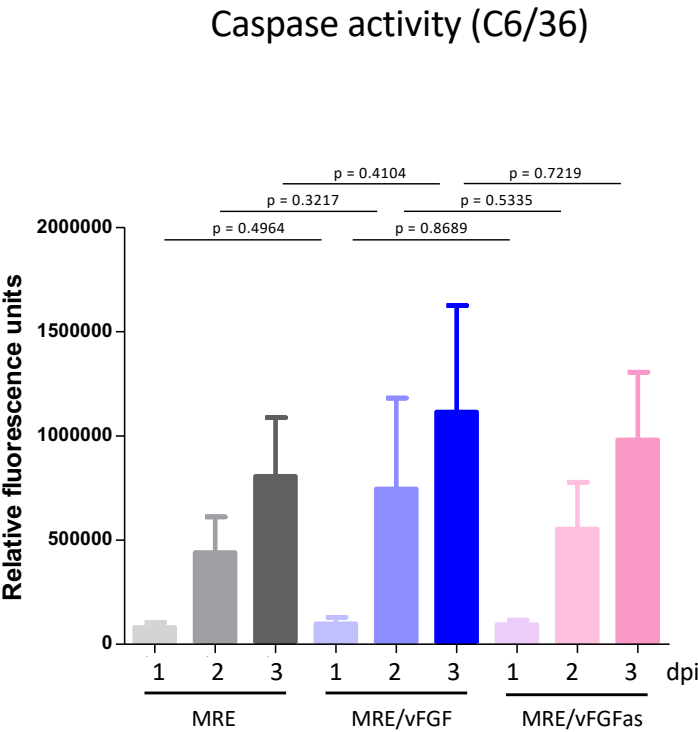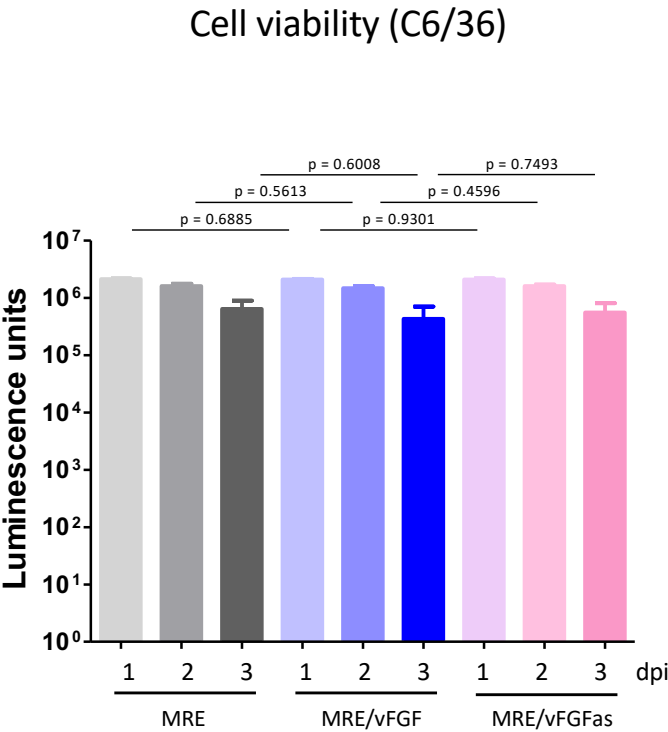

Fig. S3

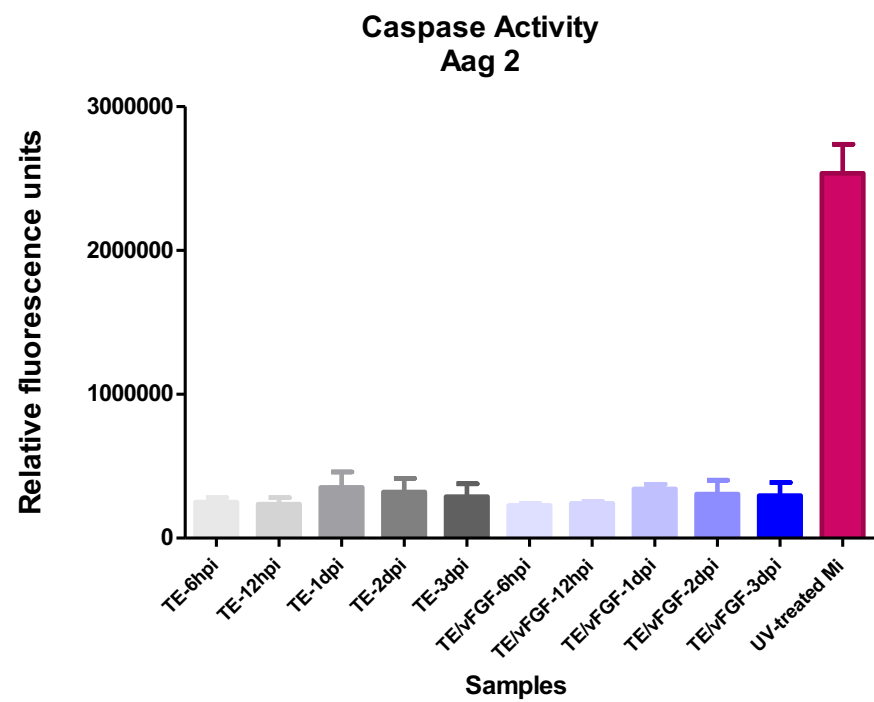

Supplement: s1 [file s1]
